# Supplementary material
Source: HighWire-hosted journal article supplement (https://erj.ersjournals.com/content/57/4/2004234)
Supplement: inline-supplementary-material-1 [file inline-supplementary-material-1.pdf]

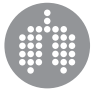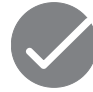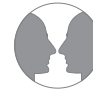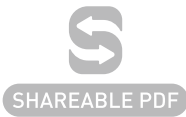

# Vitamin D status and seroconversion for COVID-19 in UK healthcare workers

Aduragbemi A. Faniyi<sup>1,5</sup>, Sebastian T. Lugg<sup>1,5</sup>, Sian E. Faustini<sup>2</sup>, Craig Webster<sup>3</sup>, Joanne E. Duffy<sup>3</sup>, Martin Hewison<sup>4</sup>, Adrian Shields <sup>2,3</sup>, Peter Nightingale<sup>3</sup>, Alex G. Richter<sup>2,3,6</sup> and David R. Thickett<sup>1,3,6</sup>

**Affiliations:** <sup>1</sup>Birmingham Acute Care Research Group, Institute of Inflammation and Ageing, University of Birmingham, Birmingham, UK. <sup>2</sup>Clinical Immunology Service, Institute of Immunology and Immunotherapy, University of Birmingham, Birmingham, UK. <sup>3</sup>University Hospitals Birmingham NHS Foundation Trust, Birmingham, UK. <sup>4</sup>Institute of Metabolism and Systems Research, University of Birmingham, Birmingham, UK. <sup>5</sup>Joint first authors. <sup>6</sup>Joint last authors.

**Correspondence:** David R. Thickett, Institute of Inflammation and Ageing, University of Birmingham, Birmingham B15 2TH, UK. E-mail: d.thickett@bham.ac.uk

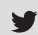

@ERSpublications

**NHS staff with vitamin D deficiency were more likely to have developed COVID-19, with staff from BAME ethnicity being the most vitamin D deficient** <https://bit.ly/2J3kVTc>

**Cite this article as:** Faniyi AA, Lugg ST, Faustini SE, *et al.* Vitamin D status and seroconversion for COVID-19 in UK healthcare workers. *Eur Respir J* 2021; 57: 2004234 [<https://doi.org/10.1183/13993003.04234-2020>].

This single-page version can be shared freely online.

## To the Editor:

The coronavirus disease 2019 (COVID-19) pandemic is a global health emergency, resulting in over 50 million infections and over 1.2 million deaths as of mid-November 2020 [1]. Healthcare workers are at a high risk of COVID-19 with large numbers of deaths reported around Europe and the UK, particularly among staff in the Black, Asian and minority ethnic (BAME) demographic group [2]. COVID-19 has disproportionately affected BAME individuals even after accounting for age, sex, social deprivation and comorbidity [3].
